# Supplementary material for: Estimated Glomerular Filtration Rate and Implantable Cardioverter‐Defibrillator in Nonischemic Systolic Heart Failure: Extended Follow‐Up of DANISH
Source: PubMed Central journal article supplement — J Am Heart Assoc. 2024 Jan 31;13(3):e031977. doi: 10.1161/JAHA.123.031977 (PMC11056118; doi:10.1161/jaha.123.031977), 2024-01-31
Supplement: JAH3-13-e031977-s001.pdf [file JAH3-13-e031977-s001.pdf]

# **SUPPLEMENTAL MATERIAL**

**Table S1. Baseline characteristics of the study population according to eGFR (above/below 60 ml/min/1.73 m<sup>2</sup>)**

|                                                      | No CKD<br>eGFR≥60<br>ml/min/1.73 m <sup>2</sup><br>N=797 | CKD<br>eGFR <60<br>ml/min/1.73 m <sup>2</sup><br>N=316 | P-value |
|------------------------------------------------------|----------------------------------------------------------|--------------------------------------------------------|---------|
| Age, median (interquartile range)                    | 61 (54-68)                                               | 68 (62-74)                                             | <0.001  |
| Male sex, N (%)                                      | 551 (69.1)                                               | 256 (81.0)                                             | <0.001  |
| Physiologic measures, median (interquartile range)   |                                                          |                                                        |         |
| Systolic blood pressure, mmHg                        | 124 (111-139)                                            | 121 (109-138)                                          | 0.07    |
| Heart rate, bpm                                      | 69 (61-77)                                               | 68 (62-74)                                             | 0.66    |
| BMI, kg/m <sup>2</sup>                               | 27 (24-30)                                               | 28 (24-31)                                             | <0.001  |
| NT-proBNP, pg/mL                                     | 1,003 (512-2,012)                                        | 1,590 (866-3,145)                                      | <0.001  |
| eGFR, mL/min/1.73m <sup>2</sup>                      | 83 (71-97)                                               | 49 (41-56)                                             | <0.001  |
| CKD stage, N (%)                                     |                                                          |                                                        |         |
| Stage 3A (eGFR 45-59 mL/min/1.73m <sup>2</sup> )     | -                                                        | 194 (61.4)                                             |         |
| Stage 3B (eGFR 30-44 mL/min/1.73m <sup>2</sup> )     | -                                                        | 100 (31.6)                                             |         |
| Stage 4 (eGFR 15-29 mL/min/1.73m <sup>2</sup> )      | -                                                        | 22 (7.0)                                               |         |
| QRS duration, msec                                   | 143 (110-165)                                            | 150 (120-168)                                          | 0.009   |
| LVEF, %, mean (SD)                                   | 24.3 (6.3)                                               | 23.5 (6.0)                                             | 0.04    |
| Duration of HF, median (interquartile range), months | 15 (8-54)                                                | 32 (10-96)                                             | <0.001  |
| Main cause of HF, N (%)                              |                                                          |                                                        | 0.004   |
| Idiopathic                                           | 623 (78.2)                                               | 223 (70.6)                                             |         |
| Valvular                                             | 25 (3.1)                                                 | 16 (5.1)                                               |         |
| Hypertension                                         | 69 (8.7)                                                 | 48 (15.2)                                              |         |
| Other                                                | 80 (10.0)                                                | 29 (9.2)                                               |         |
| NYHA class, N (%)                                    |                                                          |                                                        | <0.001  |
| II                                                   | 465 (58.3)                                               | 130 (41.1)                                             |         |
| III/IV                                               | 332 (41.7)                                               | 186 (58.9)                                             |         |
| Medical history, N (%)                               |                                                          |                                                        |         |
| Hospitalization for HF                               | 509 (64.3)                                               | 211 (67.2)                                             | 0.36    |
| Hypertension                                         | 213 (26.7)                                               | 134 (42.5)                                             | <0.001  |
| Diabetes                                             | 122 (15.3)                                               | 87 (27.5)                                              | <0.001  |
| Atrial fibrillation                                  | 273 (34.3)                                               | 172 (54.4)                                             | <0.001  |
| Stroke                                               | 80 (10.1)                                                | 35 (11.1)                                              | 0.60    |
| Treatment, N (%)                                     |                                                          |                                                        |         |

|               |            |            |        |
|---------------|------------|------------|--------|
| ACEI/ARB      | 784 (98.4) | 290 (91.8) | <0.001 |
| Beta-blocker  | 741 (93.0) | 282 (89.2) | 0.04   |
| MRA           | 474 (59.5) | 169 (53.5) | 0.07   |
| Amiodarone    | 29 (3.6)   | 37 (11.7)  | <0.001 |
| Loop diuretic | 551 (69.1) | 279 (88.3) | <0.001 |
| Thiazide      | 60 (7.5)   | 31 (9.8)   | 0.21   |
| Metolazone    | 8 (1.0)    | 2 (0.6)    | 0.55   |
| EPO           | 1 (0.1)    | 4 (1.3)    | 0.01   |
| CRT-P/CRT-D   | 445 (55.8) | 198 (62.7) | 0.04   |

ACEI, angiotensin-converting enzyme inhibitor; ARB, angiotensin receptor blocker; BMI, body mass index; CKD, chronic kidney disease; CRT-D, cardiac resynchronization therapy defibrillator; CRT-P, cardiac resynchronization therapy pacemaker; eGFR, estimated glomerular filtration rate; EPO, erythropoietin; HF, heart failure; LVEF, left ventricular ejection fraction; MRA, mineralocorticoid receptor antagonist; NYHA, New York Heart Association; NT-proBNP, N-terminal pro-B-type natriuretic peptide; SD, standard deviation. According to the protocol, patients fulfilling criteria for CRT devices received a CRT-D if randomized to the ICD arm or received a CRT-P device if randomized to the control arm.

**Table S2. Baseline characteristics of the study population according to treatment assignment and eGFR (above/below median)**

|                                                      | No CKD<br>eGFR $\geq$ 73 ml/min/1.73 m $^2$<br>N=563 |                    |         | CKD<br>eGFR<73 ml/min/1.73 m $^2$<br>N=550 |                    |         |
|------------------------------------------------------|------------------------------------------------------|--------------------|---------|--------------------------------------------|--------------------|---------|
|                                                      | Control group<br>N=280                               | ICD group<br>N=283 | P-value | Control group<br>N=278                     | ICD group<br>N=272 | P-value |
| Age, median (interquartile range)                    | 60 (54-66)                                           | 60 (53-69)         | 0.57    | 66 (60-72)                                 | 68 (62-73)         | 0.10    |
| Male sex, N (%)                                      | 175 (62.5)                                           | 182 (64.3)         | 0.66    | 227 (81.7)                                 | 223 (82.0)         | 0.92    |
| Physiologic measures, median (interquartile range)   |                                                      |                    |         |                                            |                    |         |
| Systolic blood pressure, mmHg                        | 125 (113-139)                                        | 123 (110-140)      | 0.54    | 123 (110-136)                              | 122 (109-138)      | 0.61    |
| Heart rate, bpm                                      | 69 (62-79)                                           | 69 (61-77)         | 0.55    | 68 (60-78)                                 | 68 (60-76)         | 0.70    |
| BMI, kg/m $^2$                                       | 26 (23-30)                                           | 27 (23-30)         | 0.21    | 28 (25-30)                                 | 27 (24-31)         | 0.83    |
| NT-proBNP, pg/mL                                     | 849 (467-1,767)                                      | 1,162 (497-2,136)  | 0.09    | 1,382 (712-2,721)                          | 1,292 (746-2,685)  | 0.74    |
| eGFR, mL/min/1.73cm $^2$                             | 92 (82-105)                                          | 90 (80-103)        | 0.26    | 58 (49-65)                                 | 57 (45-65)         | 0.09    |
| QRS duration, msec                                   | 145 (111-164)                                        | 145 (111-165)      | 0.78    | 147 (108-165)                              | 148 (117-168)      | 0.41    |
| LVEF, %                                              | 24.6 (6.1)                                           | 24.5 (6.1)         | 0.77    | 23.5 (6.1)                                 | 23.7 (6.5)         | 0.68    |
| Duration of HF, median (interquartile range), months | 15 (8-52)                                            | 14 (8-54)          | 0.82    | 19 (9-66)                                  | 34 (10-84)         | 0.04    |
| Main cause of HF, N (%)                              |                                                      |                    | 0.28    |                                            |                    | 0.28    |
| Idiopathic                                           | 210 (75.0)                                           | 225 (79.5)         |         | 213 (76.6)                                 | 198 (72.8)         |         |
| Valvular                                             | 8 (2.9)                                              | 12 (4.2)           |         | 13 (4.7)                                   | 8 (2.9)            |         |
| Hypertension                                         | 27 (9.6)                                             | 22 (7.8)           |         | 28 (10.1)                                  | 40 (14.7)          |         |
| Other                                                | 35 (12.5)                                            | 24 (8.5)           |         | 24 (8.6)                                   | 26 (9.6)           |         |
| NYHA class, N (%)                                    |                                                      |                    | 0.62    |                                            |                    | 0.62    |
| II                                                   | 172 (61.4)                                           | 168 (59.4)         |         | 126 (45.3)                                 | 129 (47.4)         |         |
| III/IV                                               | 108 (38.6)                                           | 115 (40.6)         |         | 152 (54.7)                                 | 143 (52.6)         |         |
| Medical history, N (%)                               |                                                      |                    |         |                                            |                    |         |
| Hospitalization for HF                               | 184 (66.0)                                           | 174 (61.9)         | 0.32    | 177 (64.6)                                 | 185 (68.0)         | 0.40    |

|                     |            |            |      |            |            |      |
|---------------------|------------|------------|------|------------|------------|------|
| Hypertension        | 67 (23.9)  | 74 (26.2)  | 0.54 | 99 (35.7)  | 107 (39.3) | 0.38 |
| Diabetes            | 52 (18.6)  | 35 (12.4)  | 0.04 | 58 (20.9)  | 64 (23.5)  | 0.45 |
| Atrial fibrillation | 79 (28.2)  | 87 (30.7)  | 0.51 | 129 (46.4) | 150 (55.2) | 0.04 |
| Stroke              | 32 (11.4)  | 23 (8.1)   | 0.19 | 32 (11.6)  | 28 (10.3)  | 0.65 |
| Treatment, N (%)    |            |            |      |            |            |      |
| ACEI/ARB            | 275 (98.2) | 281 (99.3) | 0.25 | 267 (96.0) | 251 (92.3) | 0.06 |
| Beta-blocker        | 264 (94.3) | 262 (92.6) | 0.41 | 251 (90.3) | 246 (90.4) | 0.95 |
| MRA                 | 167 (59.6) | 170 (60.1) | 0.92 | 151 (54.3) | 155 (57.0) | 0.53 |
| Amiodarone          | 6 (2.1)    | 8 (2.8)    | 0.60 | 26 (9.4)   | 26 (9.6)   | 0.93 |
| Loop diuretic       | 193 (68.9) | 187 (66.1) | 0.47 | 223 (80.2) | 227 (83.5) | 0.32 |
| Thiazide            | 22 (7.9)   | 20 (7.1)   | 0.72 | 23 (8.3)   | 26 (9.6)   | 0.60 |
| Metolazone          | 2 (0.7)    | 3 (1.1)    | 0.66 | 4 (1.4)    | 1 (0.4)    | 0.19 |
| EPO                 | 0 (0)      | 1 (0.4)    | 0.32 | 3 (1.1)    | 1 (0.4)    | 0.33 |
| CRT-P/CRT-D         | 162 (57.9) | 161 (56.9) | 0.82 | 160 (57.6) | 160 (58.8) | 0.76 |

ACEI, angiotensin-converting enzyme inhibitor; ARB, angiotensin receptor blocker; BMI, body mass index; CKD, chronic kidney disease; CRT-D, cardiac resynchronization therapy defibrillator; CRT-P, cardiac resynchronization therapy pacemaker; eGFR, estimated glomerular filtration rate; EPO, erythropoietin; HF, heart failure; ICD, implantable cardioverter defibrillator; LVEF, left ventricular ejection fraction; MRA, mineralocorticoid receptor antagonist; NYHA, New York Heart Association; NT-proBNP, N-terminal pro-B-type natriuretic peptide; SD, standard deviation. According to the protocol, patients fulfilling criteria for CRT devices received a CRT-D if randomized to the ICD arm or received a CRT-P device if randomized to the control arm.

**Table S3. Device complications according to CKD status among patients randomized to an ICD**

|                                        | No CKD<br>eGFR $\geq$ 60<br>ml/min/1.73 m <sup>2</sup><br>N=394 | CKD<br>eGFR <60<br>ml/min/1.73 m <sup>2</sup><br>N=161 | P-value |
|----------------------------------------|-----------------------------------------------------------------|--------------------------------------------------------|---------|
| Device infection, N (%)                | 18 (4.6)                                                        | 9 (5.6)                                                | 0.61    |
| Serious device infection, N (%)        | 9 (2.3)                                                         | 6 (3.7)                                                | 0.39    |
| Bleeding requiring intervention, N (%) | 0 (0.0)                                                         | 1 (0.6)                                                | N/A     |
| Pneumothorax, N (%)                    | 11 (2.8)                                                        | 0 (0.0)                                                | 0.04    |

CKD, chronic kidney disease; eGFR, estimated glomerular filtration rate; ICD, implantable cardioverter defibrillator; N/A, not applicable.

The results were analyzed from the data for the original follow-up period.

**Table S4. Effect of ICD implantation compared with usual care according to eGFR (above/below 60 ml/min/1.73 m<sup>2</sup>)**

| Outcome                                  | No CKD<br>eGFR $\geq$ 60 ml/min/1.73 m <sup>2</sup><br>N=797 |                    | CKD<br>eGFR <60 ml/min/1.73 m <sup>2</sup><br>N=316 |                    | P-value for interaction |
|------------------------------------------|--------------------------------------------------------------|--------------------|-----------------------------------------------------|--------------------|-------------------------|
|                                          | Control group<br>N=403                                       | ICD group<br>N=394 | Control group<br>N=155                              | ICD group<br>N=161 |                         |
| <b>Death from any cause</b>              |                                                              |                    |                                                     |                    |                         |
| N (%)                                    | 144 (35.7)                                                   | 121 (30.7)         | 81 (52.3)                                           | 87 (54.0)          |                         |
| Event rate per 100 person-years (95% CI) | 4.6 (3.9-5.5)                                                | 3.8 (3.2-4.6)      | 8.2 (6.6-10.2)                                      | 8.2 (6.7-10.2)     |                         |
| HR (95% CI)*                             | 0.82 (0.64-1.04)                                             |                    | 1.02 (0.75-1.38)                                    |                    | 0.31                    |
| <b>Cardiovascular death</b>              |                                                              |                    |                                                     |                    |                         |
| N (%)                                    | 105 (26.1)                                                   | 83 (21.1)          | 58 (37.4)                                           | 64 (39.8)          |                         |
| Event rate per 100 person-years (95% CI) | 3.4 (2.8-4.1)                                                | 2.6 (2.1-3.3)      | 5.9 (4.5-7.6)                                       | 6.1 (4.7-7.7)      |                         |
| HR (95% CI)*                             | 0.77 (0.58-1.03)                                             |                    | 1.05 (0.73-1.51)                                    |                    | 0.20                    |
| <b>Sudden cardiovascular death</b>       |                                                              |                    |                                                     |                    |                         |
| N (%)                                    | 33 (8.2)                                                     | 19 (4.8)           | 23 (14.8)                                           | 16 (9.9)           |                         |
| Event rate per 100 person-years (95% CI) | 1.1 (0.8-1.5)                                                | 0.6 (0.4-0.9)      | 2.3 (1.5-3.5)                                       | 1.5 (0.9-2.5)      |                         |
| HR (95% CI)*                             | 0.57 (0.32-1.00)                                             |                    | 0.65 (0.34-1.24)                                    |                    | 0.70                    |
| <b>Non-cardiovascular death</b>          |                                                              |                    |                                                     |                    |                         |
| N (%)                                    | 39 (9.7)                                                     | 38 (9.6)           | 23 (14.8)                                           | 23 (14.3)          |                         |
| Event rate per 100 person-years (95% CI) | 1.3 (0.9-1.7)                                                | 1.2 (0.9-1.7)      | 2.3 (1.5-3.5)                                       | 2.2 (1.4-3.3)      |                         |
| HR (95% CI)*                             | 0.94 (0.60-1.47)                                             |                    | 0.94 (0.52-1.68)                                    |                    | 0.93                    |

CI, confidence interval; CKD, chronic kidney disease; HR, hazard ratio; ICD, implantable cardioverter-defibrillator; eGFR, estimated glomerular filtration rate.

\*Stratified according to center and cardiac resynchronization therapy implantation (preexisting or planned).

**Table S5. Effect of ICD implantation compared with usual care according to eGFR (above/below median)**

| Outcome                                  | eGFR $\geq$ 73 ml/min/1.73 m <sup>2</sup><br>N=563 |                    | eGFR<73ml/min/1.73 m <sup>2</sup><br>N=550 |                    | P-value for interaction |
|------------------------------------------|----------------------------------------------------|--------------------|--------------------------------------------|--------------------|-------------------------|
|                                          | Control group<br>N=280                             | ICD group<br>N=283 | Control group<br>N=278                     | ICD group<br>N=272 |                         |
| <b>Death from any cause</b>              |                                                    |                    |                                            |                    |                         |
| N (%)                                    | 88 (31.4)                                          | 80 (28.3)          | 137 (49.3)                                 | 128 (47.1)         |                         |
| Event rate per 100 person-years (95% CI) | 4.0 (3.3-5.0)                                      | 3.5 (2.8-4.4)      | 7.2 (6.1-8.5)                              | 6.6 (5.6-7.9)      |                         |
| HR (95% CI)*                             | 0.86 (0.63-1.17)                                   |                    | 0.91 (0.71-1.16)                           |                    | 0.78                    |
| HR (95% CI) <sup>†</sup>                 | 0.88 (0.65-1.20)                                   |                    | 0.81 (0.63-1.03)                           |                    | 0.64                    |
| <b>Cardiovascular death</b>              |                                                    |                    |                                            |                    |                         |
| N (%)                                    | 65 (23.2)                                          | 56 (19.8)          | 98 (35.3)                                  | 91 (33.5)          |                         |
| Event rate per 100 person-years (95% CI) | 3.0 (2.3-3.8)                                      | 2.5 (1.9-3.2)      | 5.1 (4.2-6.2)                              | 4.7 (3.8-5.8)      |                         |
| HR (95% CI)*                             | 0.81 (0.56-1.17)                                   |                    | 0.91 (0.68-1.21)                           |                    | 0.67                    |
| HR (95% CI) <sup>†</sup>                 | 0.86 (0.59-1.24)                                   |                    | 0.79 (0.59-1.07)                           |                    | 0.71                    |
| <b>Sudden cardiovascular death</b>       |                                                    |                    |                                            |                    |                         |
| N (%)                                    | 26 (9.3)                                           | 16 (5.7)           | 30 (10.8)                                  | 19 (7.0)           |                         |
| Event rate per 100 person-years (95% CI) | 1.2 (0.8-1.7)                                      | 0.7 (0.4-1.1)      | 1.6 (1.1-2.2)                              | 1.0 (0.6-1.5)      |                         |
| HR (95% CI)*                             | 0.61 (0.33-1.15)                                   |                    | 0.63 (0.35-1.12)                           |                    | 0.95                    |
| HR (95% CI) <sup>†</sup>                 | 0.63 (0.33-1.18)                                   |                    | 0.52 (0.29-0.95)                           |                    | 0.73                    |
| <b>Non-cardiovascular death</b>          |                                                    |                    |                                            |                    |                         |
| N (%)                                    | 23 (8.2)                                           | 24 (8.5)           | 39 (14.0)                                  | 37 (13.6)          |                         |
| Event rate per 100 person-years (95% CI) | 1.1 (0.7-1.6)                                      | 1.1 (0.7-1.6)      | 2.0 (1.5-2.8)                              | 1.9 (1.4-2.6)      |                         |
| HR (95% CI)*                             | 1.00 (0.56-1.77)                                   |                    | 0.92 (0.58-1.44)                           |                    | 0.86                    |
| HR (95% CI) <sup>†</sup>                 | 0.96 (0.54-1.72)                                   |                    | 0.84 (0.53-1.33)                           |                    | 0.83                    |

CI, confidence interval; CKD, chronic kidney disease; HR, hazard ratio; ICD, implantable cardioverter-defibrillator; eGFR, estimated glomerular filtration rate.

\*Stratified according to center and cardiac resynchronization therapy implantation (preexisting or planned).

<sup>†</sup> Stratified according to center and cardiac resynchronization therapy implantation (preexisting or planned) and adjusted for duration of heart failure, diabetes and atrial fibrillation.



## Figure S1. Absolute risk of outcomes according to chronic kidney disease

### A) Death from any cause

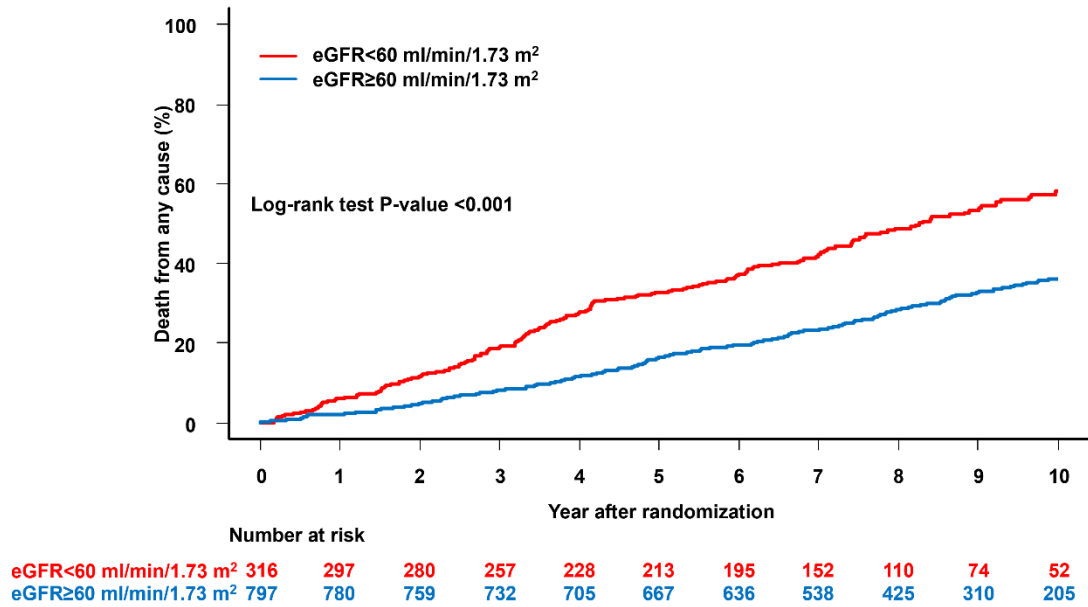

### B) Cardiovascular death

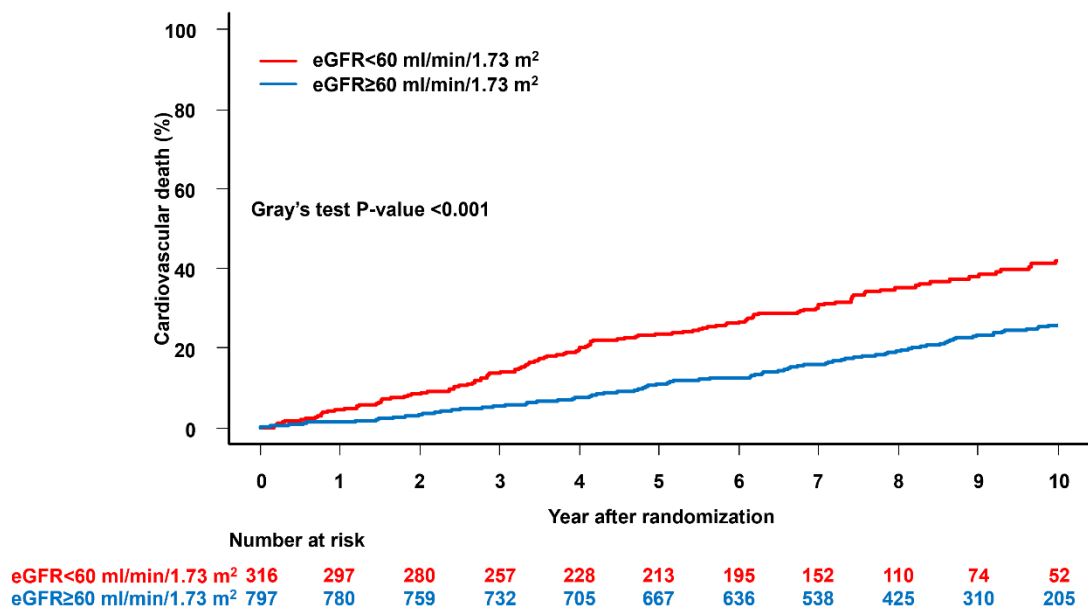

C) Sudden cardiovascular death

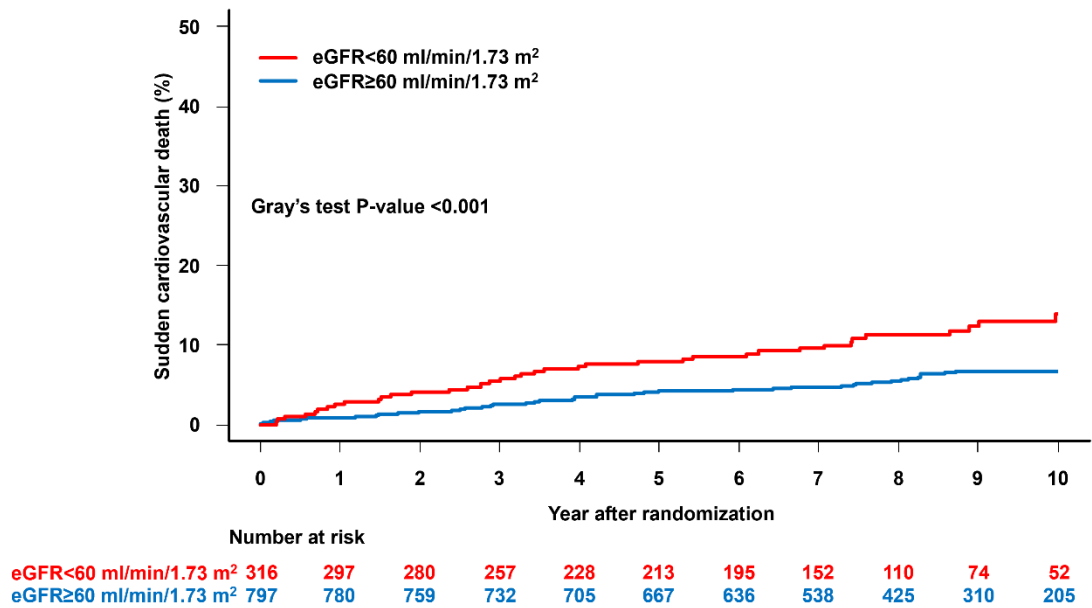

D) Non-cardiovascular death

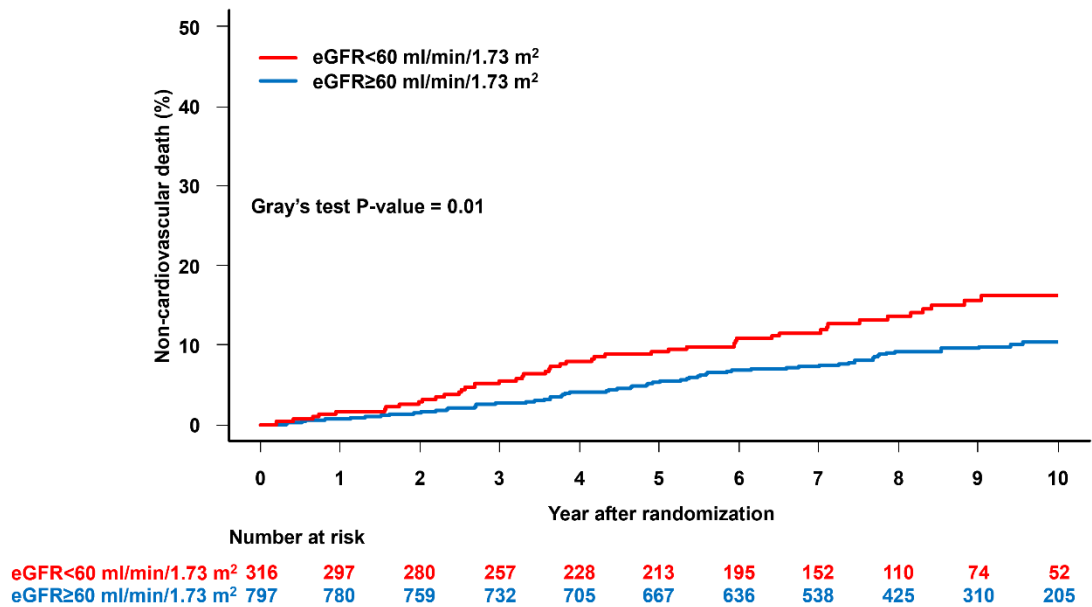

Cumulative incidence of death from any cause (using the Kaplan-Meier estimator), cardiovascular death, sudden cardiovascular death, and non-cardiovascular death (using the Aalen-Johansen estimator, taking the competing risk of other causes of death into account).

eGFR = estimated glomerular filtration rate.

**Figure S2. Effect of ICD implantation on death from any cause according to age in patients with and without chronic kidney disease**

A) Death from any cause: No chronic kidney disease ( $eGFR \geq 60$  ml/min/1.73 m<sup>2</sup>)

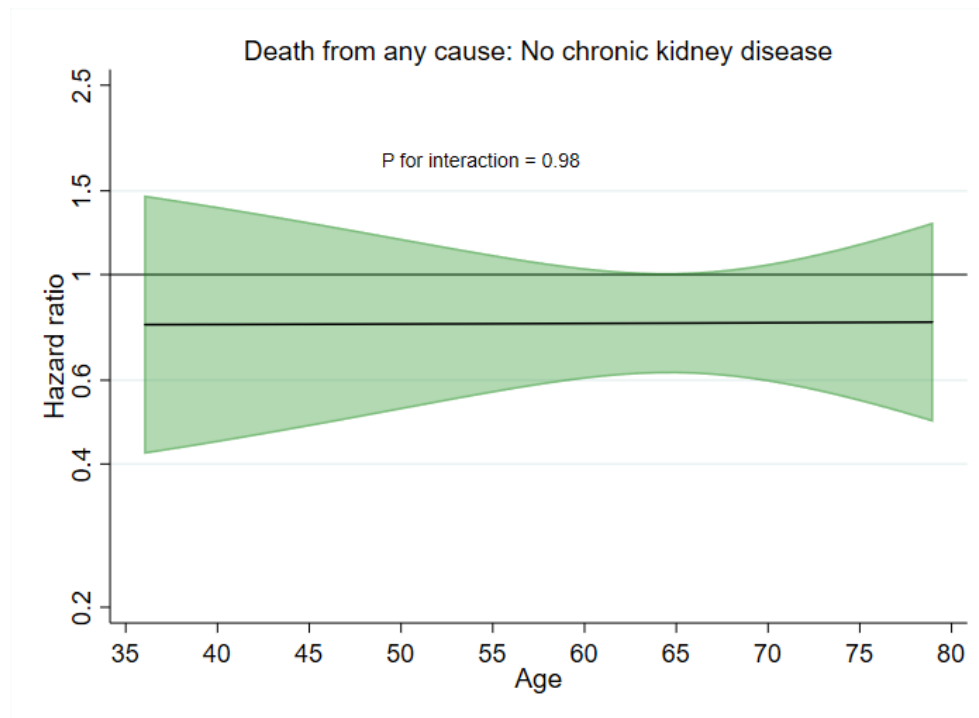

B) Death from any cause: Chronic kidney disease ( $eGFR < 60$  ml/min/1.73 m<sup>2</sup>)

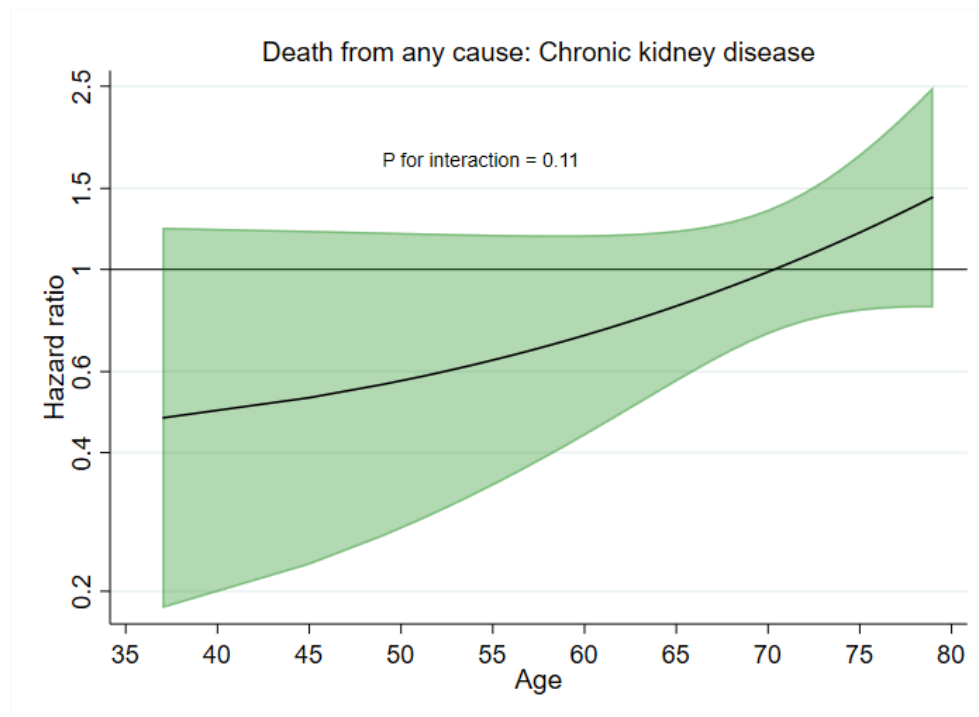

The figures show the effect of ICD implantation versus usual care on death from any cause according to continuous age in patients with (a) and without chronic kidney disease (b), respectively. Models were stratified according to center and cardiac resynchronization therapy (preexisting or planned). eGFR = estimated glomerular filtration rate; ICD = implantable cardioverter defibrillator.
